# Supplementary material for: Metformin potentiates anti-tumor effect of resveratrol on pancreatic cancer by down-regulation of VEGF-B signaling pathway
Source: PubMed Central journal article supplement (PMC5356654; doi:10.18632/oncotarget.12391), 2016-10-01
Supplement: oncotarget-07-84190-s001.pdf [file oncotarget-07-84190-s001.pdf]

## Metformin potentiates anti-tumor effect of resveratrol on pancreatic cancer by down-regulation of VEGF-B signaling pathway

### Supplementary Materials

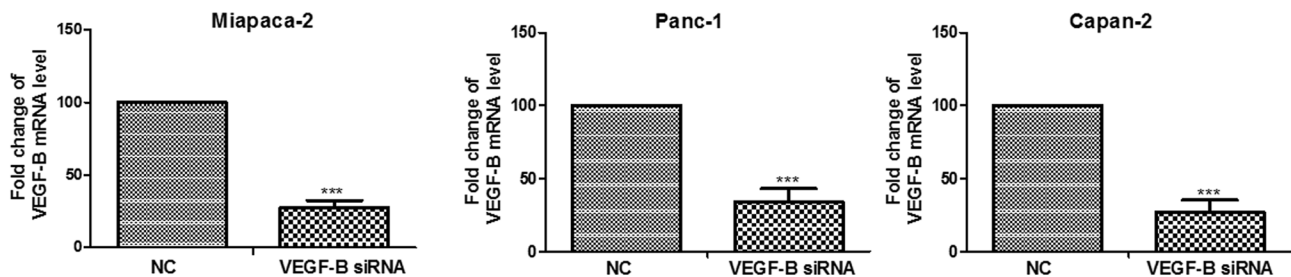

**Supplementary Figure S1: The inhibitory efficiencies of VEGF-B siRNA in PaCa cells.** VEGF-B siRNA treatment significantly decreased mRNA levels of VEGF-B in comparison with negative control siRNA (NC) in three PaCa cells.
